# Supplementary material for: Spodium, halogen and hydrogen bonds in the reactivity of bis(2,4-bis(trichloromethyl)-1,3,5-triazapentadienato)-Zn(ii)
Source: Royal Society of Chemistry journal article supplement (doi:10.1039/d3nj02994h), 2023-01-01
Supplement: d3nj02994h1.pdf [file d3nj02994h1.pdf]

## Electronic Supplementary Information

### Spodium, halogen and hydrogen bonds in the reactivity of *bis(2,4-bis(trichloromethyl)-1,3,5-triazapentadienato)-Zn(II)*

Ismayil M. Garazade,<sup>a,b</sup> Atash V. Gurbanov,<sup>\*a,b</sup> Rosa M. Gomila,<sup>c</sup> Antonio Frontera,<sup>\*c</sup>  
Ana V. M. Nunes,<sup>d</sup> Kamran T. Mahmudov<sup>\*a,b</sup> and Armando J.L. Pombeiro<sup>\*a</sup>

<sup>a</sup> Centro de Química Estrutural, Institute of Molecular Sciences, Instituto Superior Técnico, Universidade de Lisboa, Av. Rovisco Pais, 1049-001 Lisboa, Portugal

<sup>b</sup> Excellence Center, Baku State University, Z. Xalilov Str. 23, Az 1148 Baku, Azerbaijan

<sup>c</sup> Departament de Química, Universitat de les Illes Balears, Crta. de Valldemossa km7.5, Palma, Balears, Spain

<sup>d</sup> LAQV-REQUIMTE, Departamento de Química, Faculdade de Ciências e Tecnologia, Universidade Nova de Lisboa, 2829-516 Caparica, Portugal

\*Corresponding authors. Phone: +351 920210423

E-mail addresses:

[organik10@hotmail.com](mailto:organik10@hotmail.com) (Atash V. Gurbanov),

[toni.frontera@uib.es](mailto:toni.frontera@uib.es) (Antonio Frontera),

[mahmudov.kt@gmail.com](mailto:mahmudov.kt@gmail.com) (Kamran T. Mahmudov),

[pombeiro@tecnico.ulisboa.pt](mailto:pombeiro@tecnico.ulisboa.pt) (A.J.L. Pombeiro).

## 1. Materials and instrumentation

All the chemicals were obtained from commercial sources and used as received. The IR spectra ( $4000\text{--}400\text{ cm}^{-1}$ ) were recorded on a Bruker Alpha-P ATR-IR Spectrometer. The  $^1\text{H}$  and  $^{13}\text{C}$  NMR spectra were obtained at room temperature on a Bruker 400.13 MHz spectrometer using  $\text{Si}(\text{CH}_3)_4$  as the internal reference.

## 2. $^1\text{H}/^{13}\text{C}$ NMR spectroscopy

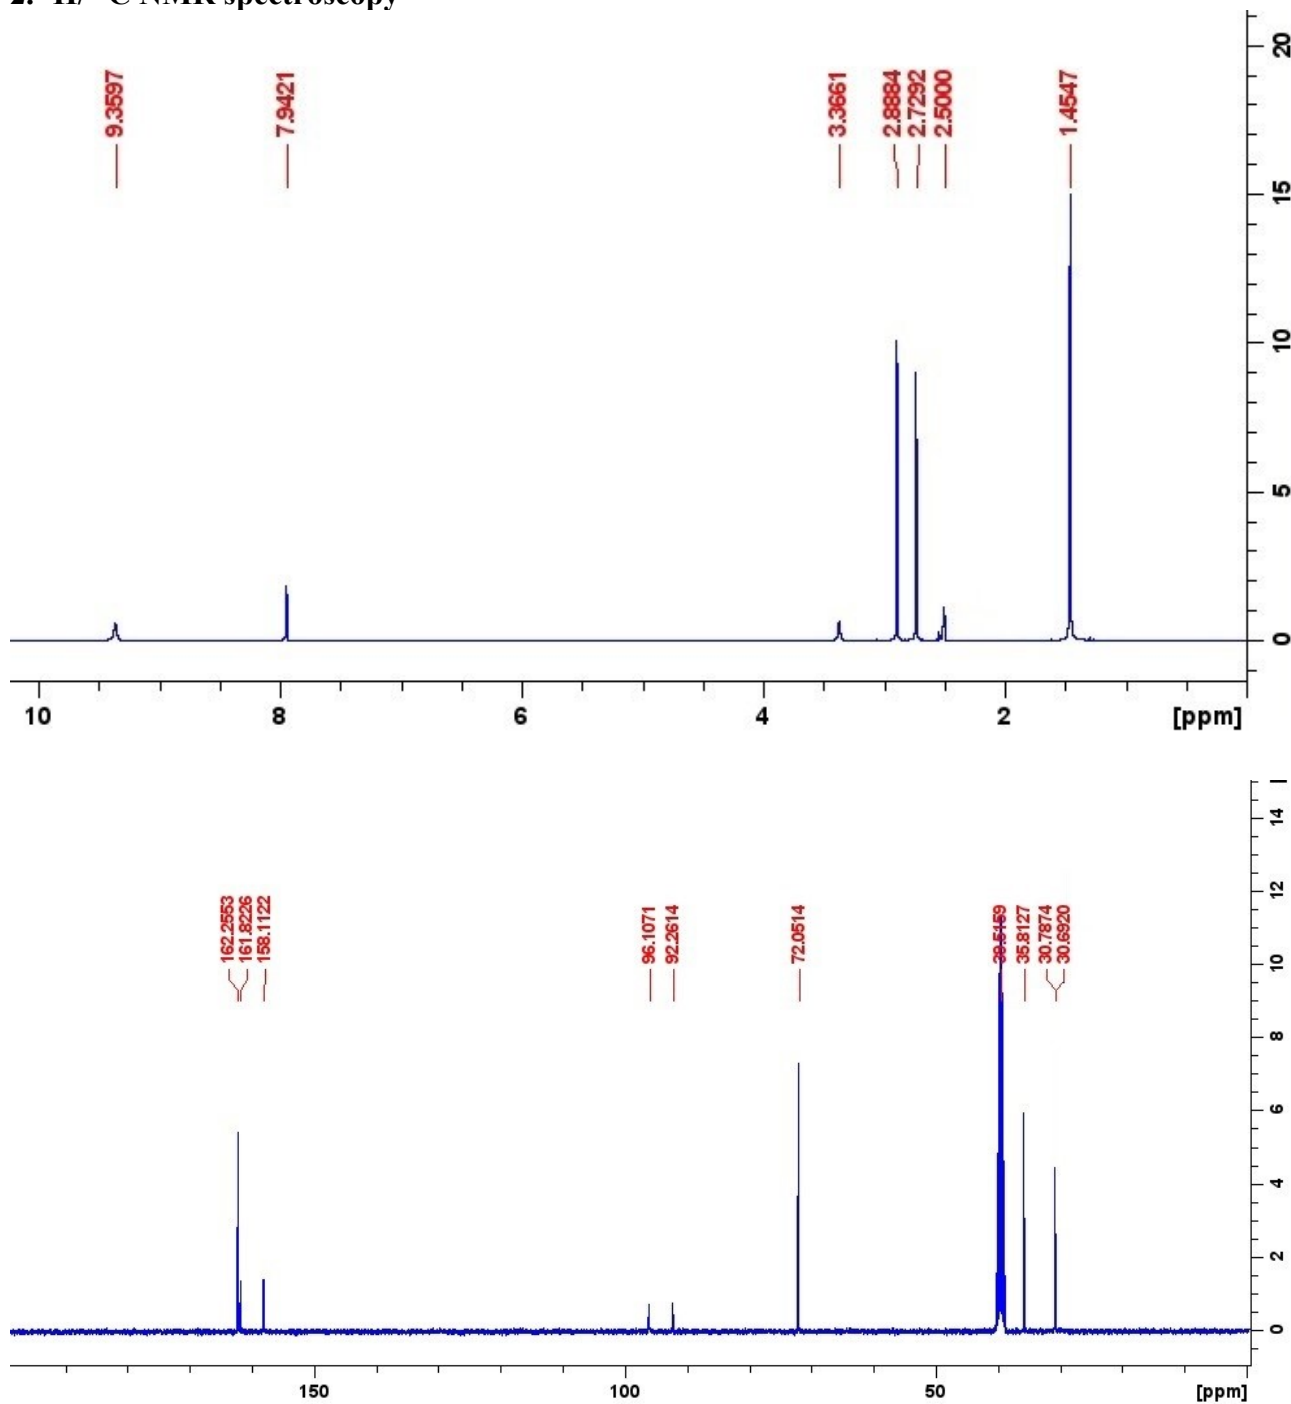

Fig. S1.  $^1\text{H}/^{13}\text{C}$  NMR spectra of 4.

### 3. IR spectroscopy

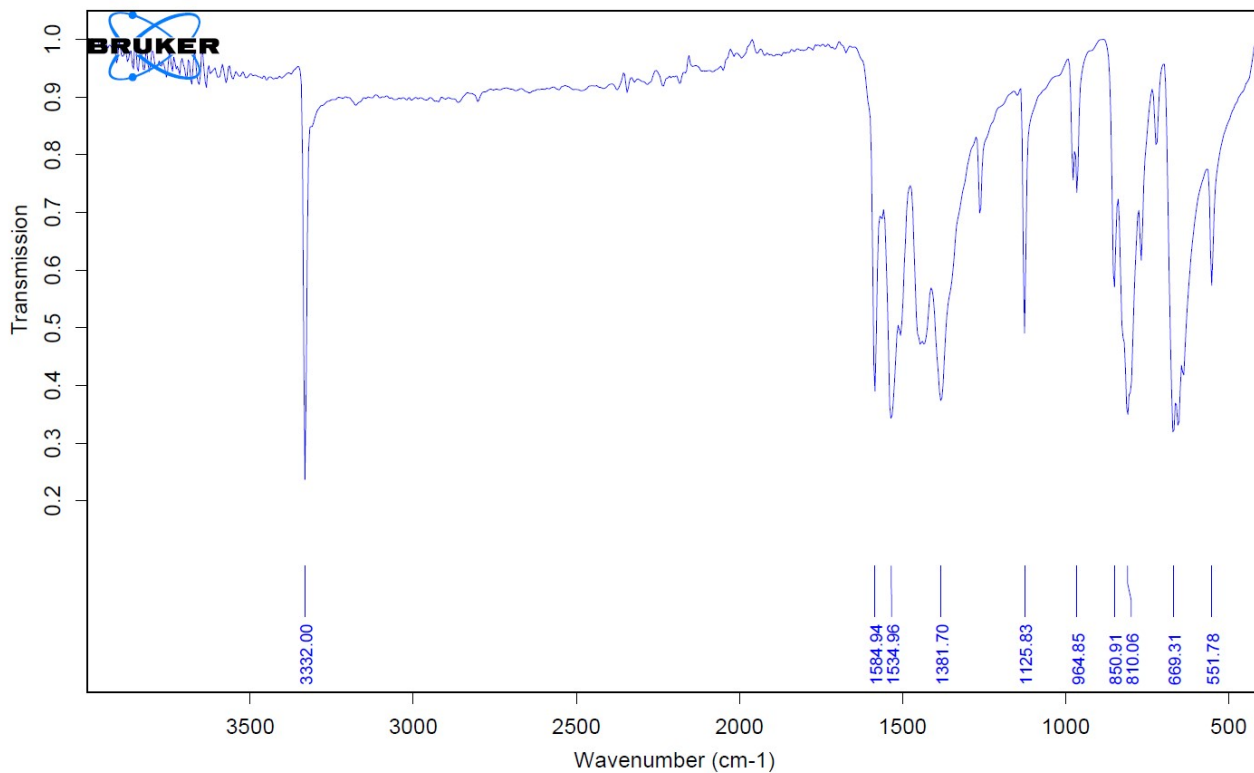

**Fig. S2.** IR spectrum of **3**.

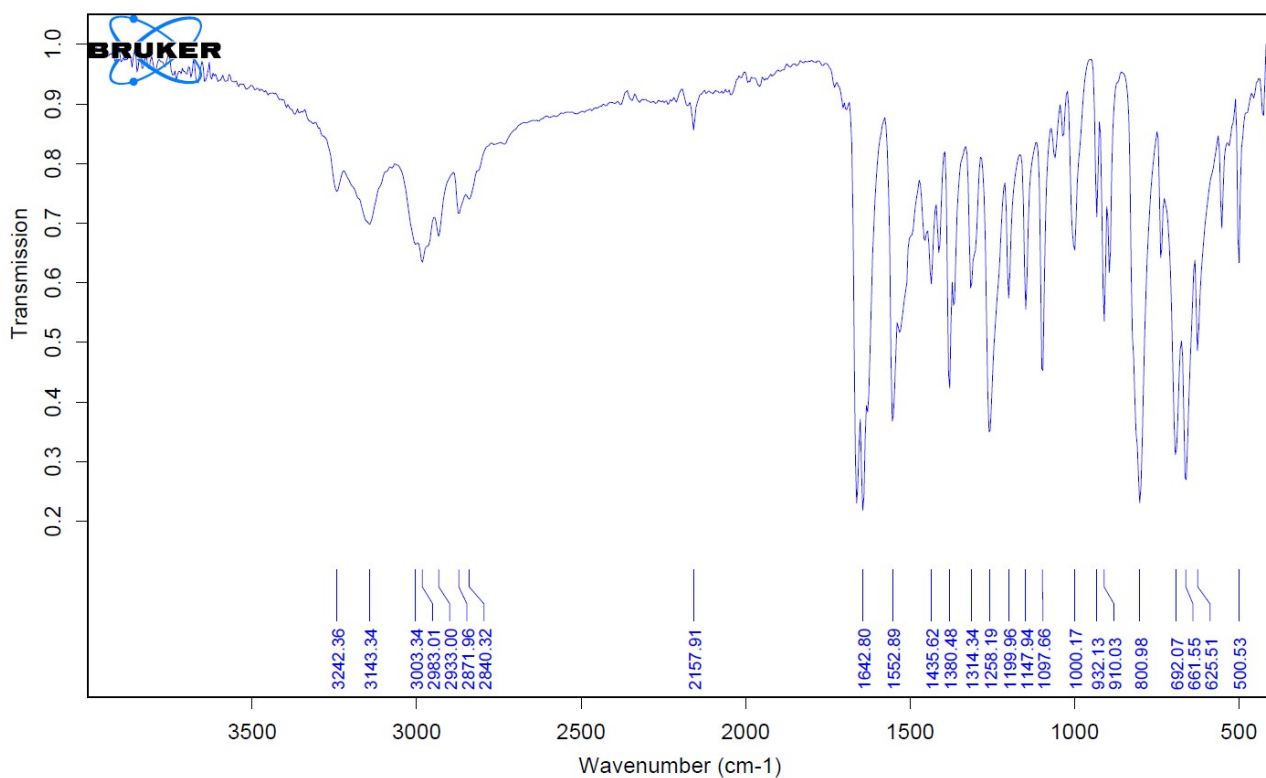

**Fig. S3.** IR spectrum of **4**.

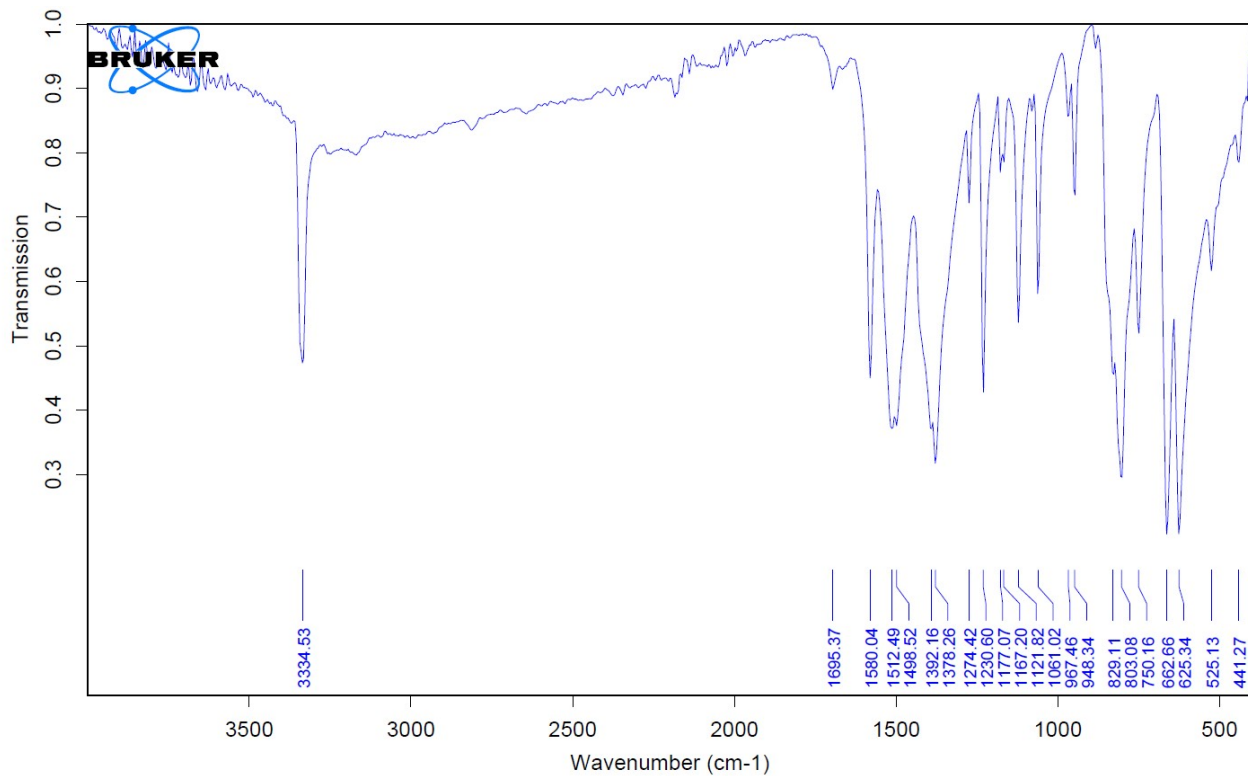

**Fig. S4.** IR spectrum of **5**.

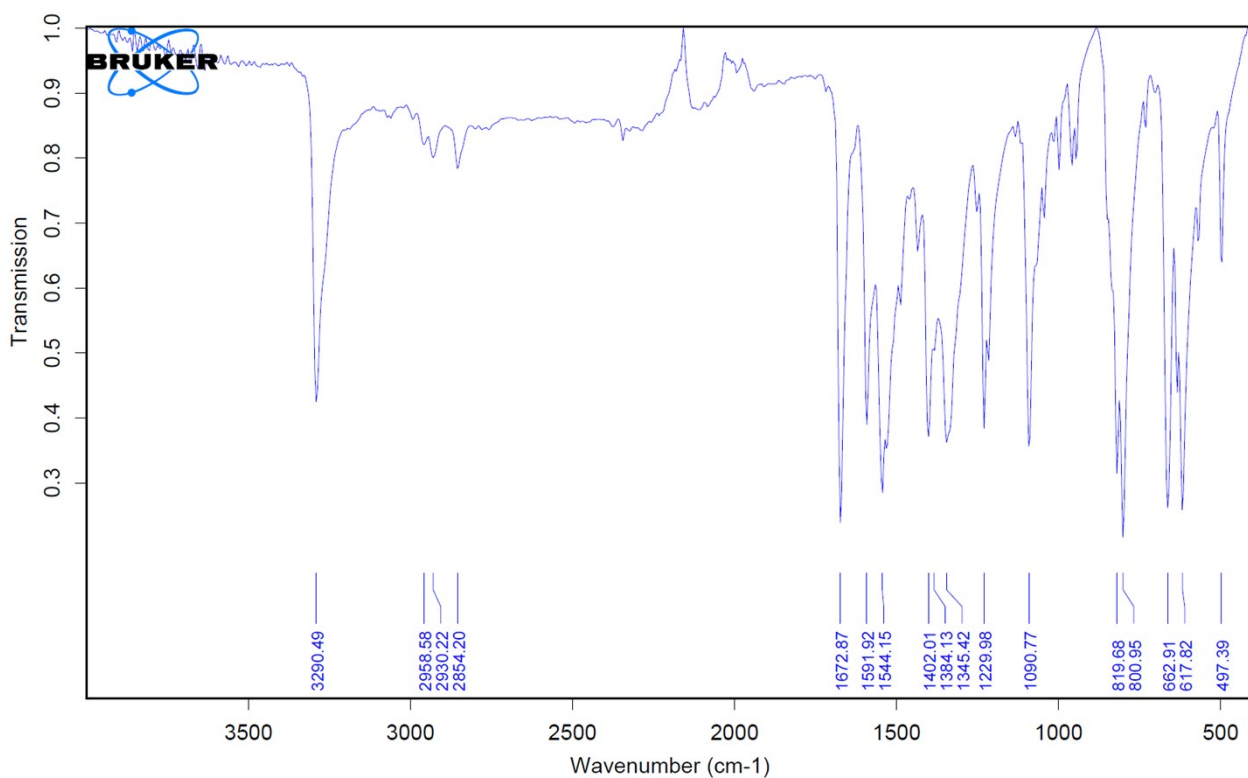

**Fig. S5.** IR spectrum of **6**.

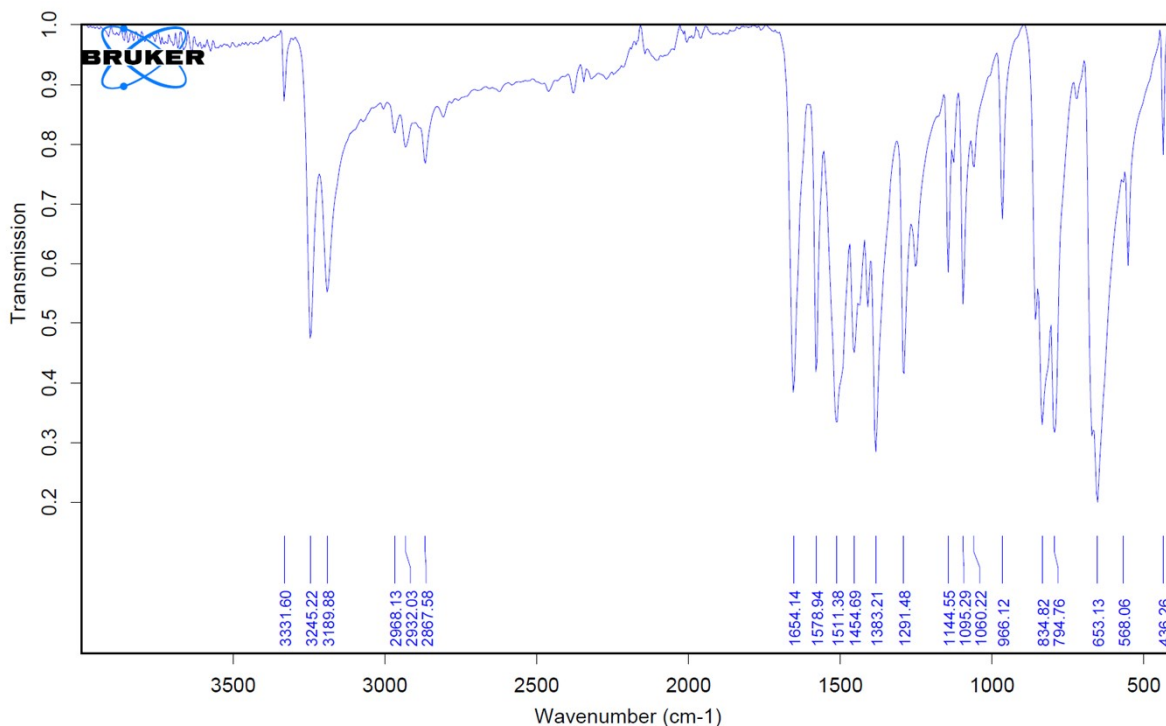

**Fig. S6.** IR spectrum of **7**.

#### 4. X-ray analysis

X-ray diffraction intensities of **3–7** were collected using a Bruker SMART APEX-II CCD area detector equipped with graphite-monochromated Mo-K $\alpha$  radiation ( $\lambda = 0.71073 \text{ \AA}$ ) at 296 K. Absorption correction was applied by SADABS.<sup>1,2</sup> The structure was solved by direct methods and refined on  $F^2$  by full-matrix least-squares using Bruker's SHELXTL-97.<sup>3</sup> All non-hydrogen atoms were refined anisotropically. The details of the crystallographic data for **3–7** are summarized in Table S1. Crystallographic data for the structural analysis have been deposited to the Cambridge Crystallographic Data Centre [CCDC 2257225 (for **3**), 2259693 (for **4**), 2252980 (for **5**), 2252981 (for **6**) and 2252982 (for **7**)]. Copy of this information can be obtained free of charge from The Director, CCDC, 12 Union Road, Cambridge CB2 1EZ, UK (Fax: (+44) 1223-336033; E-mail: deposit@ccdc.cam.ac.uk or www.ccdc.cam.ac.uk/data\_request/cif).

**Table S1.** Crystallographic data and structure refinement details for **3–7**.

|                                                 | <b>3</b>                                                                         | <b>4</b>                                                         | <b>5</b>                                                                         | <b>6</b>                                                                           | <b>7</b>                                                                         |
|-------------------------------------------------|----------------------------------------------------------------------------------|------------------------------------------------------------------|----------------------------------------------------------------------------------|------------------------------------------------------------------------------------|----------------------------------------------------------------------------------|
| Empirical formula                               | C <sub>14</sub> H <sub>16</sub> Cl <sub>12</sub> CuN <sub>6</sub> O <sub>2</sub> | C <sub>10</sub> H <sub>14</sub> Cl <sub>6</sub> N <sub>4</sub> O | C <sub>14</sub> H <sub>10</sub> Cl <sub>12</sub> N <sub>10</sub> Zn <sub>2</sub> | C <sub>24</sub> H <sub>26</sub> Cl <sub>12</sub> N <sub>10</sub> O <sub>2</sub> Zn | C <sub>14</sub> H <sub>18</sub> Cl <sub>12</sub> CuN <sub>8</sub> O <sub>2</sub> |
| Formula weight                                  | 789.27                                                                           | 418.95                                                           | 874.46                                                                           | 977.32                                                                             | 819.30                                                                           |
| Crystal system                                  | Monoclinic                                                                       | Orthorhombic                                                     | Triclinic                                                                        | Monoclinic                                                                         | Triclinic                                                                        |
| Space group                                     | C2/m                                                                             | Pca2 <sub>1</sub>                                                | P-1                                                                              | C2/c                                                                               | P-1                                                                              |
| <i>a</i> (Å)                                    | 12.961(4)                                                                        | 20.3492(17)                                                      | 8.7888(7)                                                                        | 19.7000(12)                                                                        | 5.8826(7)                                                                        |
| <i>b</i> (Å)                                    | 9.431(3)                                                                         | 5.7478(5)                                                        | 12.0326(8)                                                                       | 11.8120(6)                                                                         | 11.8884(14)                                                                      |
| <i>c</i> (Å)                                    | 13.904(4)                                                                        | 15.0320(15)                                                      | 15.2596(9)                                                                       | 17.6378(18)                                                                        | 12.3119(14)                                                                      |
| $\alpha$ (°)                                    | 90                                                                               | 90                                                               | 79.677(2)                                                                        | 90                                                                                 | 112.979(4)                                                                       |
| $\beta$ (°)                                     | 119.710(15)                                                                      | 90                                                               | 82.623(2)                                                                        | 112.803(2)                                                                         | 96.810(4)                                                                        |
| $\gamma$ (°)                                    | 90                                                                               | 90                                                               | 69.903(2)                                                                        | 90                                                                                 | 102.216(4)                                                                       |
| <i>V</i> (Å <sup>3</sup> )                      | 1476.1(8)                                                                        | 1758.2(3)                                                        | 1487.04(18)                                                                      | 3783.5(5)                                                                          | 755.14(15)                                                                       |
| <i>Z</i>                                        | 2                                                                                | 4                                                                | 2                                                                                | 4                                                                                  | 1                                                                                |
| <i>D</i> <sub>calc</sub> (g/cm <sup>3</sup> )   | 1.776                                                                            | 1.583                                                            | 1.953                                                                            | 1.716                                                                              | 1.802                                                                            |
| F000                                            | 782                                                                              | 848                                                              | 856                                                                              | 1960                                                                               | 407                                                                              |
| $\mu$ (mm <sup>-1</sup> )                       | 1.852                                                                            | 0.979                                                            | 2.719                                                                            | 1.538                                                                              | 1.816                                                                            |
| <i>R</i> <sub>int</sub>                         | 0.0310                                                                           | 0.0444                                                           | 0.0286                                                                           | 0.0599                                                                             | 0.0705                                                                           |
| <i>R</i> ( <i>F</i> ) ( <i>I</i> ≥ 2σ)          | 0.0232                                                                           | 0.0354                                                           | 0.0376                                                                           | 0.0339                                                                             | 0.0430                                                                           |
| w <i>R</i> ( <i>F</i> <sup>2</sup> ) (all data) | 0.0526                                                                           | 0.0730                                                           | 0.0924                                                                           | 0.0806                                                                             | 0.0737                                                                           |
| GOF ( <i>F</i> <sup>2</sup> )                   | 1.015                                                                            | 1.019                                                            | 1.067                                                                            | 1.051                                                                              | 0.946                                                                            |

$$^a RI = \Sigma ||F_o| - |F_c|| / \Sigma |F_o|. \quad ^b wR2 = [\Sigma [w(F_o^2 - F_c^2)^2] / \Sigma [w(F_o^2)^2]]^{1/2}.$$

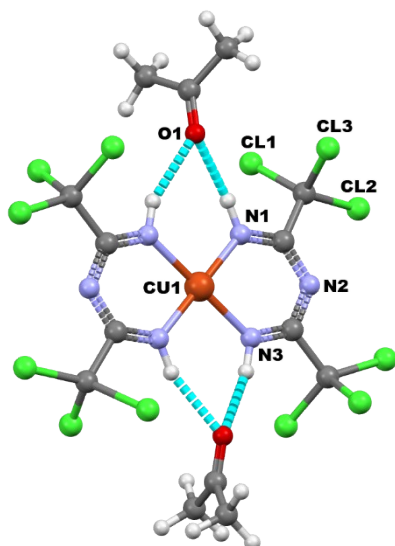

Fig. S7. Molecular structure of 3.

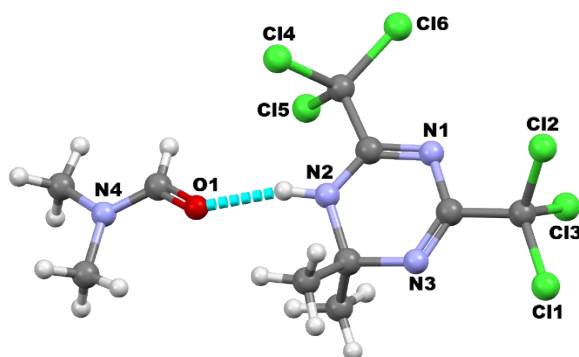

Fig. S8. Molecular structure of 4.

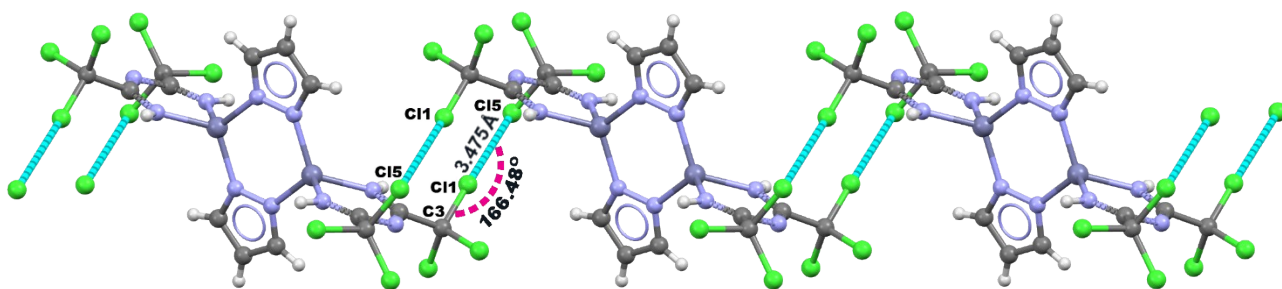

Fig. S9. Halogen bonded 1D supramolecular chain in crystal packing of 5.



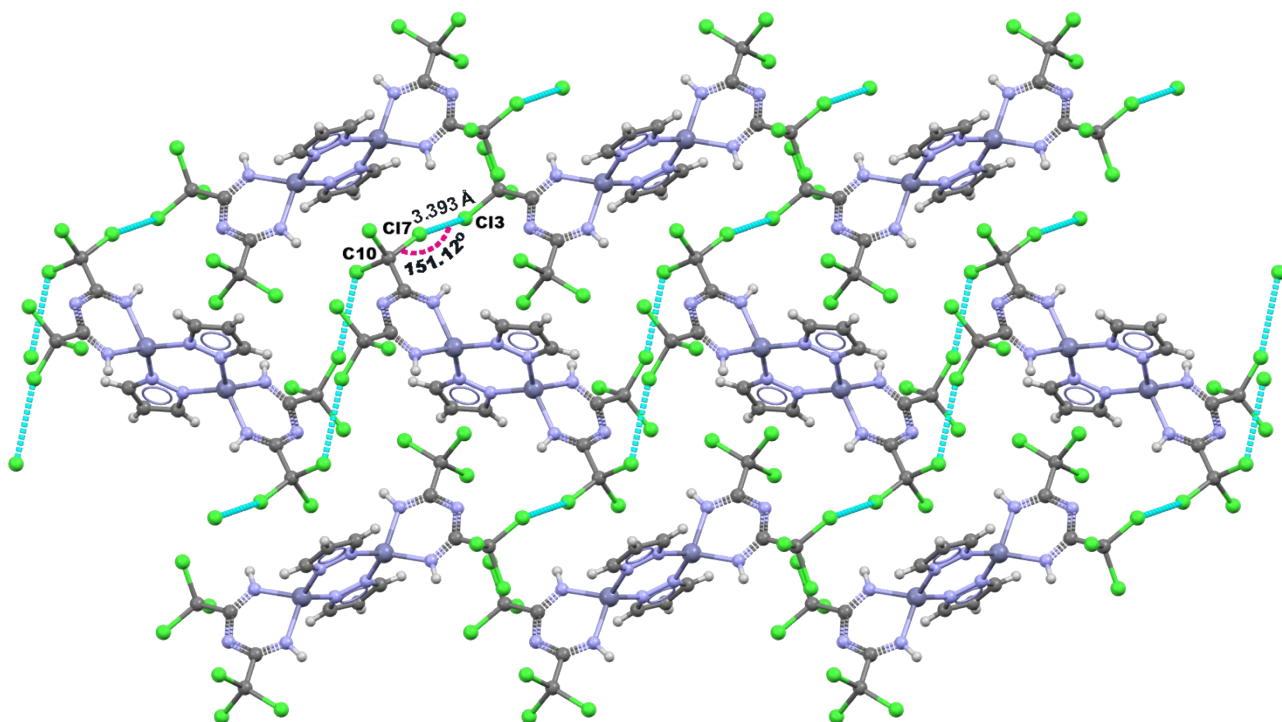

Fig. S10. Halogen bonded 2D network in crystal packing of 5.

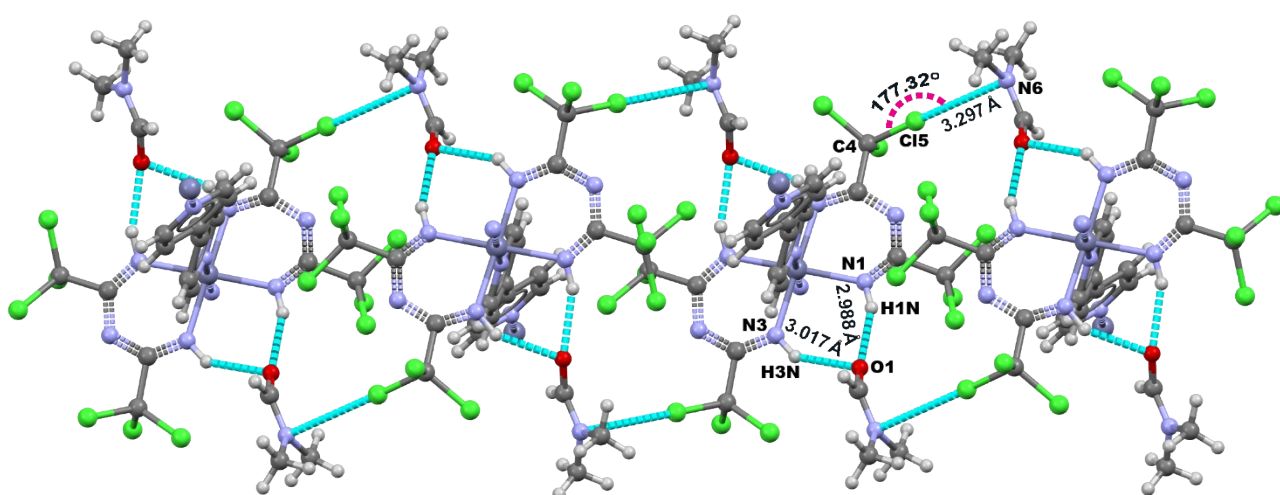

Fig. S11. Halogen bonded 1D supramolecular chain in crystal packing of 6.

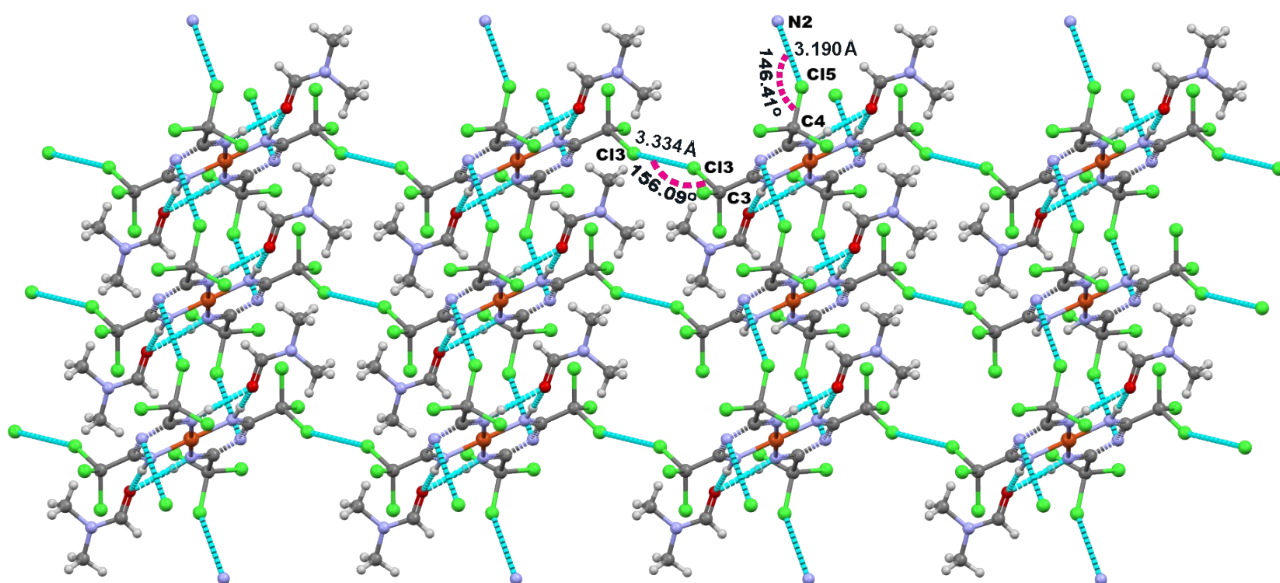

Fig. S12. Halogen bonded 2D network in crystal packing of 7.

## 5. DFT calculations

### 5.1 Theoretical methods

The calculations reported herein were performed using the Turbomole 7.2 program.<sup>4</sup> The crystallographic coordinates were used for the single point calculations of the SpB dimer of Fig. 3c (main text) or as starting point for the optimization of the geometry shown in Fig. 3d (main text). The level of theory used for the calculations was PBE0<sup>5</sup>-D4<sup>6</sup>/def2-TZVP.<sup>7</sup> The MEP surface plots were generated using the wavefunction obtained at the same level of theory and the 0.01 a.u. isosurface to simulate the van der Waals envelope. The topological analysis of the electron density was carried out according to the quantum theory of atoms in molecules (QTAIM) method proposed by Bader<sup>8</sup> and the reduced density gradient (RDG) isosurfaces (NCIplot)<sup>9</sup> and represented using the VMD program.<sup>10</sup> The NBO analysis<sup>11</sup> was performed using the same level of theory and the NBO7.0 program.<sup>12</sup>

### 5.2 Figure S13

The rotated model used to evaluate the SpB in **6** (energy given at the bottom of Fig. 3c (main text) is shown in Fig. S13.

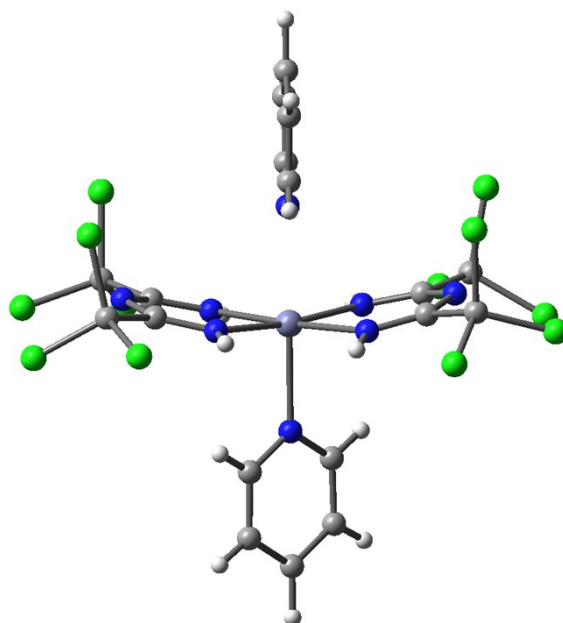

Fig. S13. Rotated model of the SpB complex of compound **6**.

### 5.3. Cartesian coordinates of the optimized complex (see Fig. 3d, main text)

|    |            |            |            |
|----|------------|------------|------------|
| Zn | 0.0000000  | 0.0000000  | -0.0352615 |
| Cl | 3.8718361  | -3.1350328 | 0.2453216  |
| Cl | 2.2008719  | -4.9783718 | -1.1855311 |
| Cl | 2.0199527  | -4.7759535 | 1.7009037  |
| Cl | -2.1717713 | -4.8374552 | -1.5399127 |
| Cl | -2.3557262 | -4.7967944 | 1.3531495  |
| Cl | -3.9638580 | -3.0201055 | -0.2276251 |
| N  | 1.3928316  | -1.5753748 | 0.0009451  |
| H  | 2.3889981  | -1.3970023 | 0.0502941  |
| N  | -0.0519878 | -3.4457357 | 0.0167064  |
| N  | -1.4365617 | -1.5319464 | -0.0610901 |
| H  | -2.4268949 | -1.3247714 | -0.1136763 |
| N  | -0.0000000 | -0.0000000 | 2.2813108  |
| C  | 1.1235639  | -2.8344577 | 0.0582506  |
| C  | -1.2074853 | -2.8001844 | -0.0529637 |
| C  | 2.2623882  | -3.8811080 | 0.1959461  |



|    |            |            |            |
|----|------------|------------|------------|
| C  | -2.3811430 | -3.8148744 | -0.1152367 |
| C  | 0.1013134  | 1.1378699  | 2.9630779  |
| H  | 0.1824347  | 2.0470798  | 2.3781817  |
| C  | 0.1054387  | 1.1871040  | 4.3463117  |
| H  | 0.1897892  | 2.1404099  | 4.8524888  |
| C  | 0.0000000  | -0.0000000 | 5.0519066  |
| C  | -0.1013134 | -1.1378699 | 2.9630779  |
| H  | -0.1824347 | -2.0470798 | 2.3781817  |
| C  | -0.1054387 | -1.1871040 | 4.3463117  |
| H  | -0.1897892 | -2.1404099 | 4.8524888  |
| Cl | -3.8718361 | 3.1350328  | 0.2453216  |
| Cl | -2.2008719 | 4.9783718  | -1.1855311 |
| Cl | -2.0199527 | 4.7759535  | 1.7009037  |
| Cl | 2.1717713  | 4.8374552  | -1.5399127 |
| Cl | 2.3557262  | 4.7967944  | 1.3531495  |
| Cl | 3.9638580  | 3.0201055  | -0.2276251 |
| N  | -1.3928316 | 1.5753748  | 0.0009451  |
| H  | -2.3889981 | 1.3970023  | 0.0502941  |
| N  | 0.0519878  | 3.4457357  | 0.0167064  |
| N  | 1.4365617  | 1.5319464  | -0.0610901 |
| H  | 2.4268949  | 1.3247714  | -0.1136763 |
| C  | -1.1235639 | 2.8344577  | 0.0582506  |
| C  | 1.2074853  | 2.8001844  | -0.0529637 |
| C  | -2.2623882 | 3.8811080  | 0.1959461  |
| C  | 2.3811430  | 3.8148744  | -0.1152367 |
| N  | -0.0000000 | -0.0000000 | -2.3383143 |
| C  | 0.0000000  | -0.0000000 | -5.1079516 |
| C  | -0.0664338 | 1.1900929  | -4.4025205 |
| H  | -0.1198457 | 2.1454550  | -4.9090602 |
| C  | -0.0633803 | 1.1407843  | -3.0192875 |
| H  | -0.1138776 | 2.0512175  | -2.4324924 |
| C  | 0.0664338  | -1.1900929 | -4.4025205 |
| H  | 0.1198457  | -2.1454550 | -4.9090602 |
| C  | 0.0633803  | -1.1407843 | -3.0192875 |
| H  | 0.1138776  | -2.0512175 | -2.4324924 |
| H  | -0.0000000 | -0.0000000 | -6.1917890 |
| H  | -0.0000000 | -0.0000000 | 6.1357372  |

## References

- 1 SMART & SAINT Software Reference Manuals, Version 6.22; Bruker AXS Analytic X-ray Systems, Inc., Madison, WI, 2000.
- 2 G. M. Sheldrick, SADABS Software for Empirical Absorption Correction; University of Göttingen: Germany, 2000.
- 3 G. M. Sheldrick, SHELXTL V5.1, Software Reference Manual; Bruker AXS Inc.: Madison, WI, 1997.
- 4 R. Ahlrichs, M. Bär, M. Häser, H. Horn, C. Kölmel, Electronic structure calculations on workstation computers: The program system turbomole. *Chemical Physics Letters* 1989, 162, 165-169.
- 5 C. Adamo, V. Barone, Toward reliable density functional methods without adjustable parameters: The PBE0 model. *The Journal of Chemical Physics* 1999, 110, 6158-6170.
- 6 E. Caldeweyher, S. Ehlert, A. Hansen, H. Neugebauer, S. Spicher, C. Bannwarth, S. Grimme, *J. Chem. Phys.*, 2019, 150, 154122
- 7 F. Weigend, Accurate Coulomb-fitting basis sets for H to Rn. *Physical Chemistry Chemical Physics* 2006, 8, 1057-1065.
- 8 R. F. W. Bader, A quantum theory of molecular structure and its applications. *Chemical Reviews* 1991, 91, 893-928.
- 9 J. Contreras-García, E. R. Johnson, S. Keinan, R. Chaudret, J.-P. Piquemal, D. N. Beratan, W. Yang, NCIPLLOT: A Program for Plotting Noncovalent Interaction Regions. *Journal of Chemical Theory and Computation* 2011, 7, 625-632.
- 10 W. Humphrey, A. Dalke, K. Schulten, VMD: Visual molecular dynamics. *Journal of Molecular Graphics* 1996, 14, 33-38.
- 11 E. D. Glendening, C. R. Landis, F. Weinhold, NBO 7.0: New vistas in localized and delocalized chemical bonding theory. *Journal of Computational Chemistry* 2019, 40, 2234-2241.

- 12 E. D. Glendening, A. E. Reed, J. E. Carpenter, J. A. Bohmann, C. M. Morales, P. Karafiloglou, C. R. Landis, F. Weinhold, NBO 7.0. , Theoretical Chemistry Institute, University of Wisconsin, Madison, WI., 2018.
